# Supplementary material for: Fe2O3/Porous Carbon Composite Derived from Oily Sludge Waste as an Advanced Anode Material for Supercapacitor Application
Source: MDPI journal article supplement (doi:10.3390/nano12213819), 2022-10-28
Supplement: s1 [file s1]

# Supplementary Materials

## **Fe<sub>2</sub>O<sub>3</sub>/Porous Carbon Composite Derived from Oily Sludge Waste as an Advanced Anode Material for Supercapacitor Application**

Shubing Tian <sup>1</sup>, Baoling Zhang <sup>1</sup>, Dong Han <sup>2</sup>, Zhiqiang Gong <sup>3</sup>, Xiaoyu Li<sup>1,2,\*</sup>

1. College of Mechanical and Electronic Engineering, Shandong University of Science and Technology, Qingdao 266590, China. College of New Energy, China University of Petroleum (East China), Qingdao 266580, China
2. State Grid Shandong Electric Power Research Institute, Jinan 250003, China

\* Corresponding author's E-mail: lixy2018@sdust.edu.cn

**Table S1 Elemental and proximate analyses of oily sludge**

| Items     |          | Oil sludge            |                              |      |                           |                  |
|-----------|----------|-----------------------|------------------------------|------|---------------------------|------------------|
| Elemental | analysis | C                     | H                            | O    | N                         | S                |
| (wt%)     |          | 16.38                 | 4.25                         | 8.91 | 0.32                      | 2.34             |
| Proximate | analysis | Moisture <sup>a</sup> | Volatile matter <sup>b</sup> |      | Fixed carbon <sup>a</sup> | Ash <sup>a</sup> |
| (wt%)     |          | 16.61                 | 27.38                        |      | 4.82                      | 51.19            |

<sup>a</sup> As received.

<sup>b</sup> Dry basis.

**Table S2 Pore structure parameters of samples**

| Sample                                   | $S_{\text{BET}}$<br>[m <sup>2</sup> g <sup>-1</sup> ] | $S_{\text{mirco}}$<br>[m <sup>2</sup> g <sup>-1</sup> ] | $S_{\text{meso}}$<br>[m <sup>2</sup> g <sup>-1</sup> ] | $V_{\text{pore}}$<br>[cm <sup>3</sup> g <sup>-1</sup> ] | $V_{\text{mirco}}$<br>[cm <sup>3</sup> g <sup>-1</sup> ] | $V_{\text{meso}}$<br>[cm <sup>3</sup> g <sup>-1</sup> ] |
|------------------------------------------|-------------------------------------------------------|---------------------------------------------------------|--------------------------------------------------------|---------------------------------------------------------|----------------------------------------------------------|---------------------------------------------------------|
| FPC-90                                   | 851.3                                                 | 363.7                                                   | 487.6                                                  | 0.739                                                   | 0.269                                                    | 0.470                                                   |
| FPC-180                                  | 635.2                                                 | 337.7                                                   | 297.5                                                  | 0.382                                                   | 0.236                                                    | 0.146                                                   |
| $\alpha$ -Fe <sub>2</sub> O <sub>3</sub> | 168.6                                                 | 21.65                                                   | 146.95                                                 | 0.248                                                   | 0.015                                                    | 0.233                                                   |

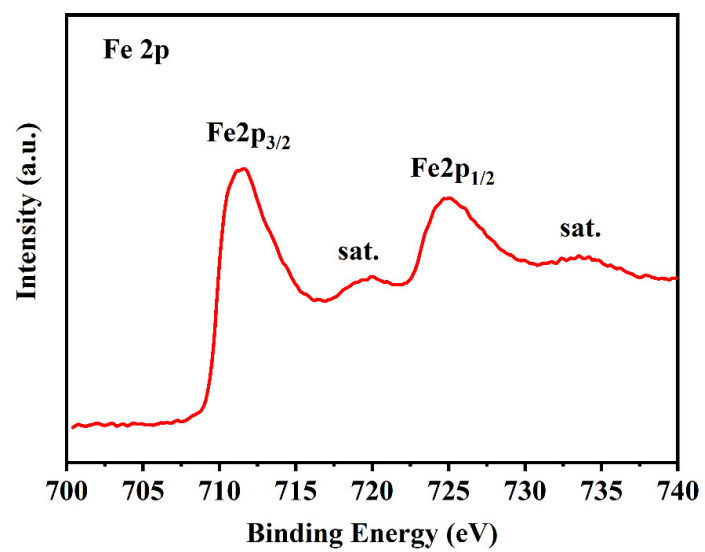

**Figure S1 High-resolution of XPS spectrum of Fe2p**

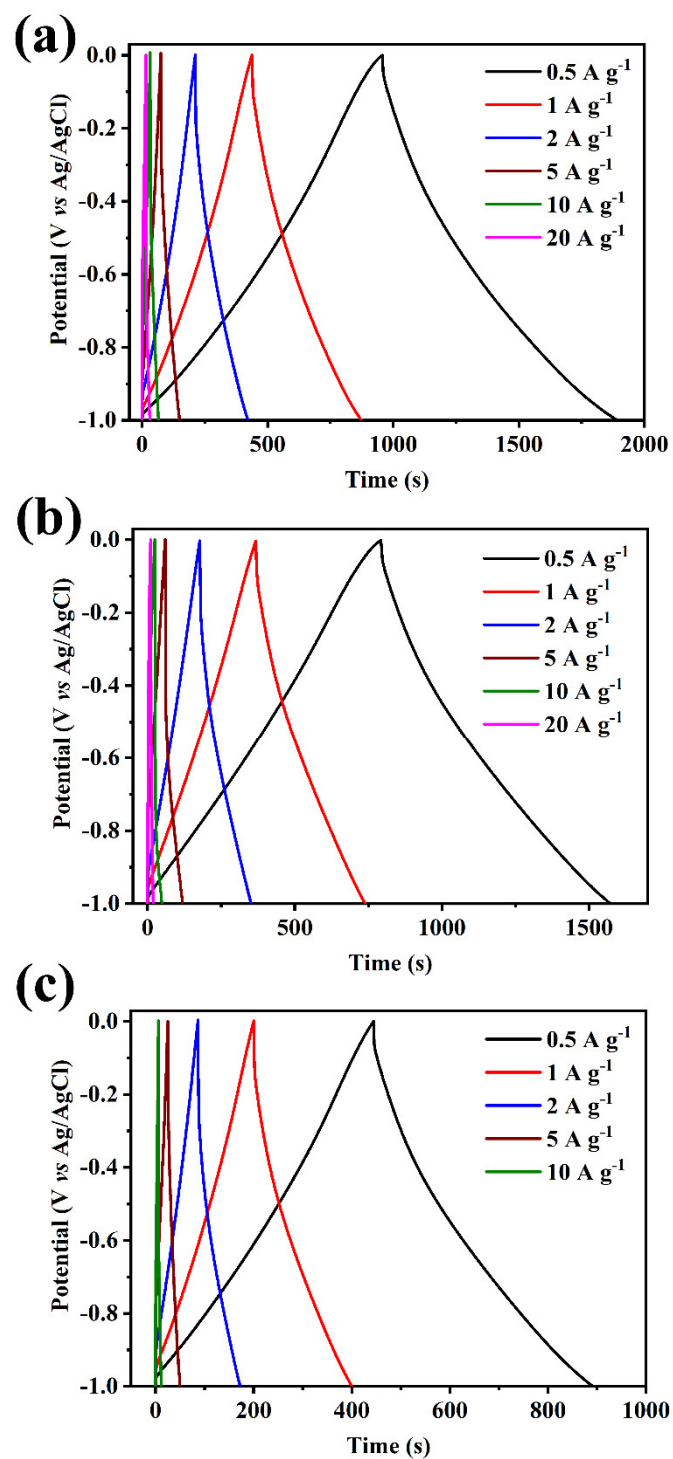

Figure S2 GCD curves of FPC composites (a) FPC-90, (b) FPC-180, (c)  $\alpha$ -Fe<sub>2</sub>O<sub>3</sub> at different current densities

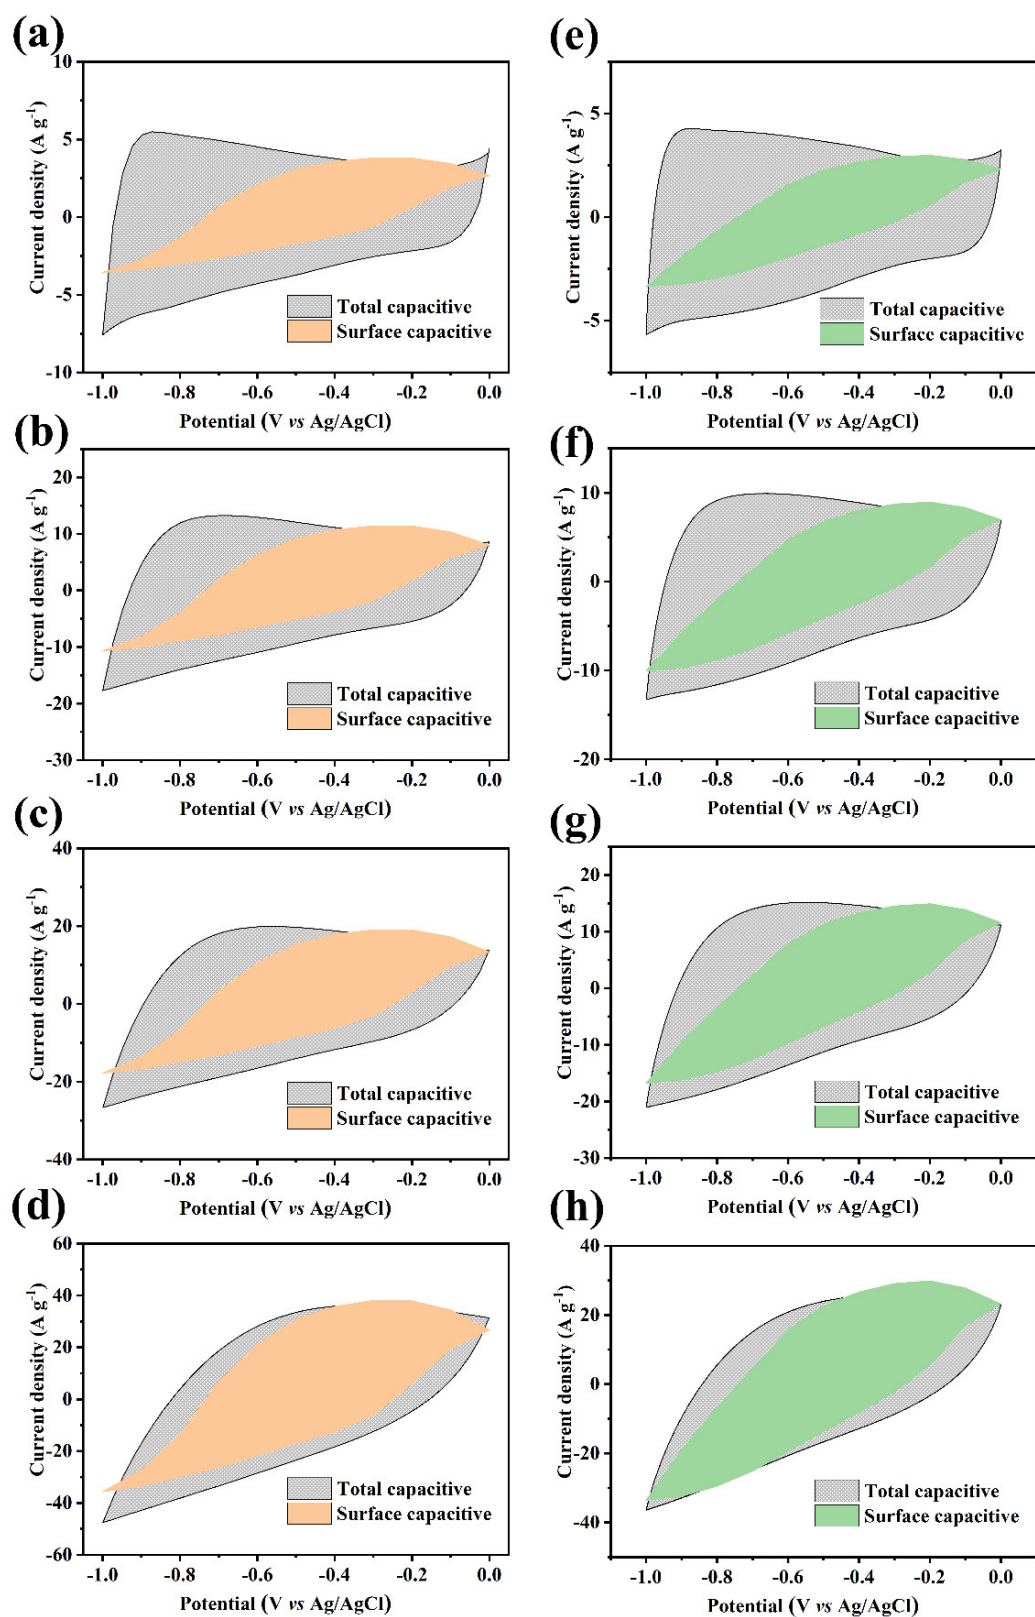

**Figure S3** The charge storage contributions of FPC-90 (a, b, c, d) and FPC-180

(e, f, g, h) at different scan rates

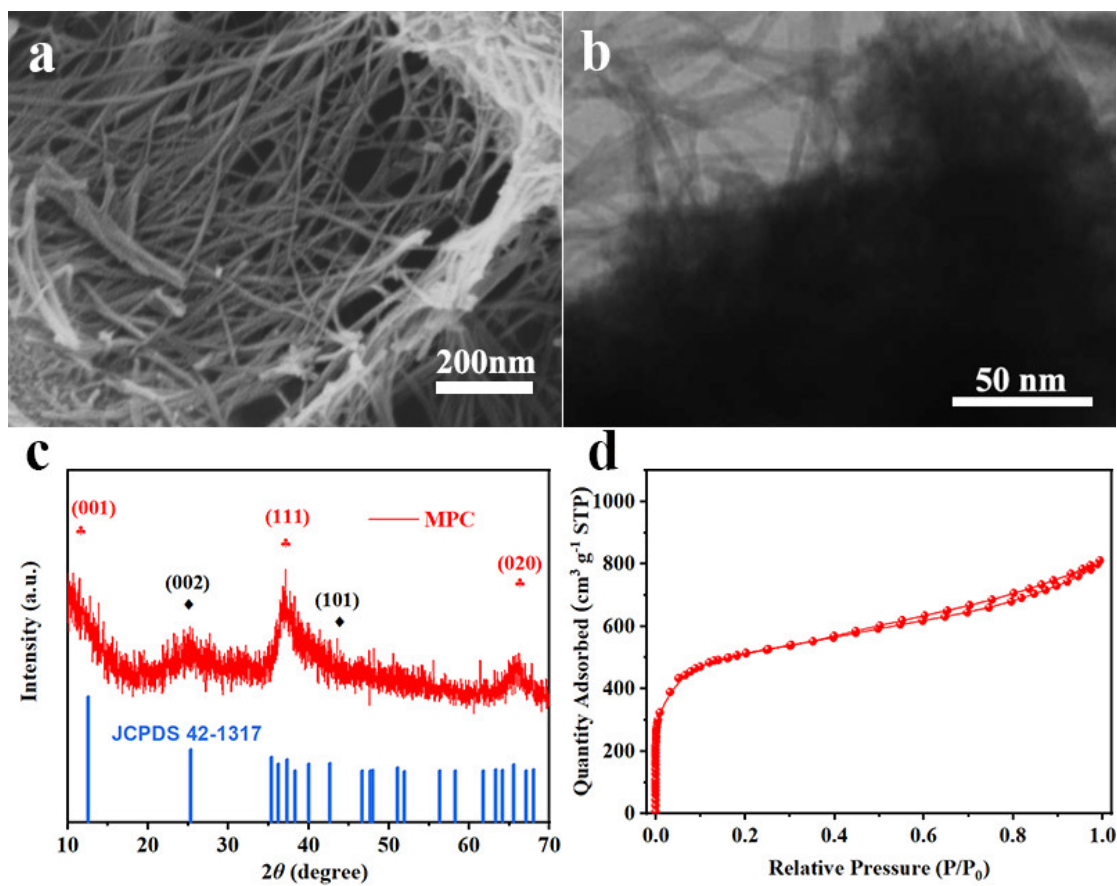

Figure S4 Characterization of MPC cathode material. (a) SEM image, TEM image, XRD pattern, and BET isotherm of MPC samples.

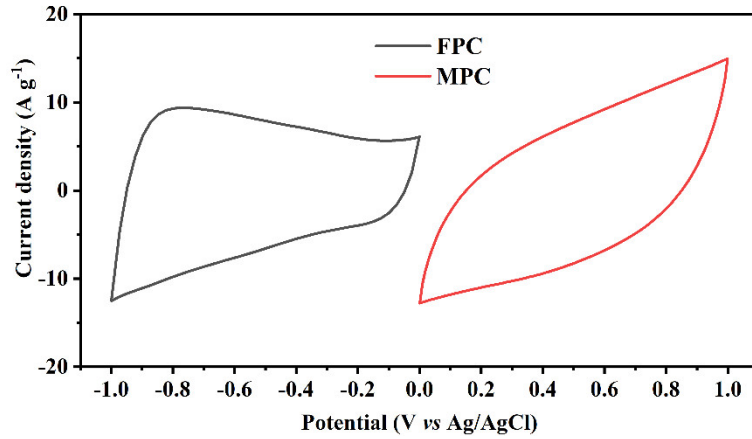

**Figure S5 Comparative CV curves of MPC and FPC electrodes**

For an ASC device, charge storage on the cathode and anode will be balance and follow the relationship of  $Q_{\text{cathode}} = Q_{\text{anode}}$ . The mass ratio of active material on both electrodes for the optimum performance satisfied the following equation:

$$\frac{m_{\text{cathode}}}{m_{\text{anode}}} = \frac{C_{\text{anode}} \times V_{\text{anode}}}{C_{\text{cathode}} \times V_{\text{cathode}}}$$

The overlaid CV curves of MPC and FPC measured on three electrode systems at a scan rate of  $20 \text{ mV s}^{-1}$  are illustrated in Fig. S5. As observed from the curves, the potential window of cathode (MPC) and anode (FPC) is in the range of 0-1.0 V and -1.0-0 V, respectively.

The specific capacitance of cathode and anode could be obtained by integrating these two CV curves. Therefore, the mass ratio of these two electrodes was calculated as about 1:1 according to the above charge balance equation.





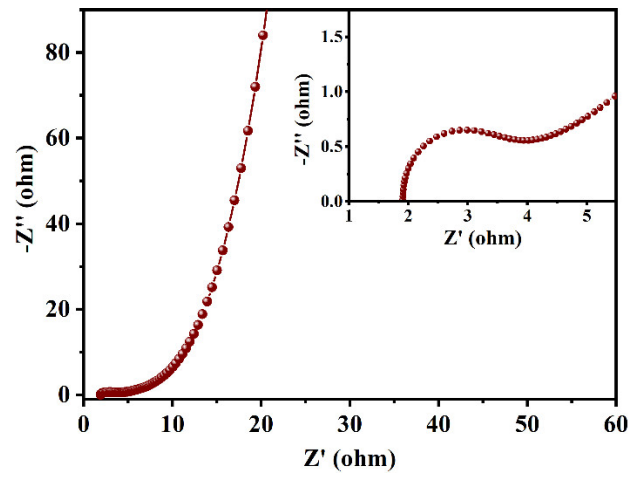

Figure S6 Nyquist plot of the ASC device

**Table S3 Specific capacitance of recently published Fe<sub>2</sub>O<sub>3</sub>/Carbon composites**

| Active material                                                          | Electrolyte                           | Potential (V)                      | Capacitance (F g <sup>-1</sup> )                |
|--------------------------------------------------------------------------|---------------------------------------|------------------------------------|-------------------------------------------------|
| Fe <sub>2</sub> O <sub>3</sub> /HPC in this work                         | 1 M Na <sub>2</sub> SO <sub>4</sub>   | -1.0 ~ 0 V<br><i>vs</i> Ag/AgCl    | 465 F g <sup>-1</sup> at 0.5 A g <sup>-1</sup>  |
| Fe <sub>2</sub> O <sub>3</sub> /ordered mesoporous carbon <sup>[1]</sup> | 1 M Na <sub>2</sub> SO <sub>3</sub>   | -1.0 ~ -0.2 V<br><i>vs</i> Ag/AgCl | 235 F g <sup>-1</sup> at 0.5 A g <sup>-1</sup>  |
| Fe <sub>2</sub> O <sub>3</sub> /CNT <sup>[2]</sup>                       | 2 M KCl                               | -1.0 ~ 0 V<br><i>vs</i> Ag/AgCl    | 296.3 F g <sup>-1</sup> at 5 mV s <sup>-1</sup> |
| α-Fe <sub>2</sub> O <sub>3</sub> /Graphene <sup>[3]</sup>                | 1 M Na <sub>2</sub> SO <sub>4</sub>   | -1.0 ~ -0.3 V<br><i>vs</i> Ag/AgCl | 343.7 F g <sup>-1</sup> at 3 A g <sup>-1</sup>  |
| α-Fe <sub>2</sub> O <sub>3</sub> /Graphene <sup>[4]</sup>                | 1 M Na <sub>2</sub> SO <sub>4</sub>   | -1.2 ~ -0.2 V<br><i>vs</i> Ag/AgCl | 306.9 F g <sup>-1</sup> at 3 A g <sup>-1</sup>  |
| Fe <sub>2</sub> O <sub>3</sub> /Graphene <sup>[5]</sup>                  | 2 M KOH                               | -1.0 ~ 0 V<br><i>vs</i> SCE        | 264 F g <sup>-1</sup> at 2.5 A g <sup>-1</sup>  |
| Fe <sub>2</sub> O <sub>3</sub> /N-doped Graphene <sup>[6]</sup>          | 1 M Na <sub>2</sub> SO <sub>4</sub>   | -1.1 ~ -0.1 V<br><i>vs</i> SCE     | 260.1 F g <sup>-1</sup> at 2 A g <sup>-1</sup>  |
| α- Fe <sub>2</sub> O <sub>3</sub> /Graphene aerogel <sup>[7]</sup>       | 0.5 M Na <sub>2</sub> SO <sub>4</sub> | -0.8~0.8 V<br><i>vs</i> SCE        | 81.3 F g <sup>-1</sup> at 1 A g <sup>-1</sup>   |
| Fe <sub>2</sub> O <sub>3</sub> nanodots/N-doped Graphene <sup>[8]</sup>  | 2 M KOH                               | -1.0~0 V<br><i>vs</i> SCE          | 274 F g <sup>-1</sup> at 1 A g <sup>-1</sup>    |

**Table S4 Performance of Fe<sub>2</sub>O<sub>3</sub>-based electrodes in asymmetric supercapacitors**

| Cathode                                                       | Anode                                                   | Voltage | Specific capacitance                                                                             | Energy density                                        |
|---------------------------------------------------------------|---------------------------------------------------------|---------|--------------------------------------------------------------------------------------------------|-------------------------------------------------------|
| MnO <sub>2</sub> /HPC                                         | Fe <sub>2</sub> O <sub>3</sub> /HPC                     | 0-2.0 V | 130.1 F g <sup>-1</sup> at 0.5 A g <sup>-1</sup><br>81 F g <sup>-1</sup> at 20 A g <sup>-1</sup> | 72.3 W h kg <sup>-1</sup> at 500 W kg <sup>-1</sup>   |
| MnO <sub>2</sub> /m-rGO                                       | Fe <sub>2</sub> O <sub>3</sub> /m-rGO <sup>[9]</sup>    | 0-1.8 V | 73.9 F g <sup>-1</sup> at 16.7 A g <sup>-1</sup>                                                 | 41.7 W h kg <sup>-1</sup> at 13.5 kW kg <sup>-1</sup> |
| GF/CoMoO <sub>4</sub>                                         | GF-CNT/Fe <sub>2</sub> O <sub>3</sub> <sup>[10]</sup>   | 0-1.6 V | 115.5 F g <sup>-1</sup> at 14 A g <sup>-1</sup>                                                  | 74.7 W h kg <sup>-1</sup> at 1.4 kW kg <sup>-1</sup>  |
| MnO <sub>2</sub> /FGS                                         | Fe <sub>2</sub> O <sub>3</sub> /FGS <sup>[11]</sup>     | 0-2.0 V | 73.2 F g <sup>-1</sup> at 10 mV s <sup>-1</sup>                                                  | 50.7 W h kg <sup>-1</sup> at 100 W kg <sup>-1</sup>   |
| 3D<br>HPC/NiCo <sub>2</sub> S <sub>4</sub>                    | 3DHPC/Fe <sub>2</sub> O <sub>3</sub> <sup>[12]</sup>    | 0-1.6 V | 101.2 F g <sup>-1</sup> at 4 A g <sup>-1</sup>                                                   | 44.4 W h kg <sup>-1</sup> at 1.62 kW kg <sup>-1</sup> |
| NiO nanosheets                                                | Fe <sub>2</sub> O <sub>3</sub> NR <sup>[13]</sup>       | 0-1.8 V | 57.2 F g <sup>-1</sup> at 1 A g <sup>-1</sup>                                                    | 12.4 W h kg <sup>-1</sup> at 312 W kg <sup>-1</sup>   |
| NiCo <sub>2</sub> O <sub>4</sub> /NiO                         | Fe <sub>2</sub> O <sub>3</sub> NP <sup>[14]</sup>       | 0-1.6 V | 57.2 F g <sup>-1</sup> at 0.33 A g <sup>-1</sup>                                                 | 19 W h kg <sup>-1</sup> at 157 W kg <sup>-1</sup>     |
| N-HPC                                                         | C@Fe <sub>2</sub> O <sub>3</sub> <sup>[15]</sup>        | 1-4 V   | -                                                                                                | 65 W h kg <sup>-1</sup> at 368 W kg <sup>-1</sup>     |
| MnO <sub>2</sub> /CNTs                                        | Fe <sub>2</sub> O <sub>3</sub> /CNTs <sup>[16]</sup>    | 0-2.0 V | 82.4 F g <sup>-1</sup> at 0.1 A g <sup>-1</sup>                                                  | 45.8 W h kg <sup>-1</sup> at 0.41 kW kg <sup>-1</sup> |
| ZnCo <sub>2</sub> O <sub>4</sub> @MnO <sub>2</sub>            | Porous α-Fe <sub>2</sub> O <sub>3</sub> <sup>[17]</sup> | 0-1.3 V | 161 F g <sup>-1</sup> at 2.5 mA cm <sup>-2</sup>                                                 | 35 W h kg <sup>-1</sup> at 163 W kg <sup>-1</sup>     |
| CuCo <sub>2</sub> O <sub>4</sub> /CuO                         | Fe <sub>2</sub> O <sub>3</sub> /rGO <sup>[18]</sup>     | 0-1.6 V | 83 F g <sup>-1</sup> at 0.5 A g <sup>-1</sup>                                                    | 33 W h kg <sup>-1</sup> at 200 W kg <sup>-1</sup>     |
| CoMoO <sub>4</sub> /NiMo<br>O <sub>4</sub> ·xH <sub>2</sub> O | Fe <sub>2</sub> O <sub>3</sub> <sup>[19]</sup>          | 0-1.6 V | 153.6 F g <sup>-1</sup> at 1 A g <sup>-1</sup>                                                   | 41.8 W h kg <sup>-1</sup> at 700 W kg <sup>-1</sup>   |
| Ni <sub>3</sub> (PO <sub>4</sub> ) <sub>2</sub> @GO           | Fe <sub>2</sub> O <sub>3</sub> @GO <sup>[20]</sup>      | 0-1.6 V | 175 F g <sup>-1</sup> at 0.5 A g <sup>-1</sup>                                                   | 67.2 W h kg <sup>-1</sup> at 200 W kg <sup>-1</sup>   |

## Reference

1. Lin, Y.; Wang, X. Y.; Qian, G.; Watkins, J. J., Additive-Driven Self-Assembly of Well-Ordered Mesoporous Carbon/Iron Oxide Nanoparticle Composites for Supercapacitors. *Chemistry of Materials* **2014**, 26, (6), 2128-2137.
2. Cheng, X. P.; Gui, X. C.; Lin, Z. Q.; Zheng, Y. J.; Liu, M.; Zhan, R. Z.; Zhu, Y.; Tang, Z. K., Three-dimensional  $\alpha$ -Fe<sub>2</sub>O<sub>3</sub>/carbon nanotube sponges as flexible supercapacitor electrodes. *Journal of Materials Chemistry A* **2015**, 3, (42), 20927-20934.
3. Yang, S.; Song, X.; Zhang, P.; Gao, L., Heating-rate-induced porous  $\alpha$ -Fe<sub>2</sub>O<sub>3</sub> with controllable pore size and crystallinity grown on graphene for supercapacitors. *ACS applied materials & interfaces* **2015**, 7, (1), 75-9.
4. Yang, S.; Song, X.; Zhang, P.; Sun, J.; Gao, L., Self-Assembled  $\alpha$ -Fe<sub>2</sub>O<sub>3</sub> mesocrystals/graphene nanohybrid for enhanced electrochemical capacitors. *Small* **2014**, 10, (11), 2270-9.
5. Wu, J.; Zhou, A.; Huang, Z.; Li, L.; Bai, H., A Facile Method to Prepare Three-Dimensional Fe<sub>2</sub>O<sub>3</sub>/Graphene Composites as the Electrode Materials for Supercapacitors. *Chinese Journal of Chemistry* **2016**, 34, (1), 67-72.
6. Zhao, P.; Li, W.; Wang, G.; Yu, B.; Li, X.; Bai, J.; Ren, Z., Facile hydrothermal fabrication of nitrogen-doped graphene/Fe<sub>2</sub>O<sub>3</sub>

composites as high performance electrode materials for supercapacitor.

*Journal of Alloys and Compounds* **2014**, 604, 87-93.

7. Song, Z.; Liu, W.; Xiao, P.; Zhao, Z.; Liu, G.; Qiu, J., Nano-iron oxide (Fe<sub>2</sub>O<sub>3</sub>)/three-dimensional graphene aerogel composite as supercapacitor electrode materials with extremely wide working potential window. *Materials Letters* **2015**, 145, 44-47.
8. Liu, L.; Lang, J. W.; Zhang, P.; Hu, B.; Yan, X. B., Facile Synthesis of Fe<sub>2</sub>O<sub>3</sub> Nano-Dots@Nitrogen-Doped Graphene for Supercapacitor Electrode with Ultralong Cycle Life in KOH Electrolyte. *ACS applied materials & interfaces* **2016**, 8, (14), 9335-9344.
9. Yang, M.; Lee, K. G.; Lee, S. J.; Lee, S. B.; Han, Y. K.; Choi, B. G., Three-Dimensional Expanded Graphene-Metal Oxide Film via Solid-State Microwave Irradiation for Aqueous Asymmetric Supercapacitors. *ACS applied materials & interfaces* **2015**, 7, (40), 22364-22371.
10. Guan, C.; Liu, J. L.; Wang, Y. D.; Mao, L.; Fan, Z. X.; Shen, Z. X.; Zhang, H.; Wang, J., Iron Oxide-Decorated Carbon for Supercapacitor Anodes with Ultrahigh Energy Density and Outstanding Cycling Stability. *Acs Nano* **2015**, 9, (5), 5198-5207.
11. Xia, H.; Hong, C. Y.; Li, B.; Zhao, B.; Lin, Z. X.; Zheng, M. B.; Savilov, S. V.; Aldoshin, S. M., Facile Synthesis of Hematite Quantum-Dot/Functionalized Graphene-Sheet Composites as Advanced Anode

Materials for Asymmetric Supercapacitors. *Advanced Functional Materials* **2015**, 25, (4), 627-635.

12. Fan, H. L.; Liu, W.; Shen, W. Z., Honeycomb-like composite structure for advanced solid state asymmetric supercapacitors. *Chemical Engineering Journal* **2017**, 326, 518-527.
13. Zhang, S. W.; Yin, B. S.; Wang, Z. B.; Peter, F., Super long-life all solid-state asymmetric supercapacitor based on NiO nanosheets and alpha-Fe<sub>2</sub>O<sub>3</sub> nanorods. *Chemical Engineering Journal* **2016**, 306, 193-203.
14. Shanmugavani, A.; Selvan, R. K., Microwave assisted reflux synthesis of NiCo<sub>2</sub>O<sub>4</sub>/NiO composite: Fabrication of high performance asymmetric supercapacitor with Fe<sub>2</sub>O<sub>3</sub>. *Electrochimica Acta* **2016**, 189, 283-294.
15. Yu, X. L.; Deng, J. J.; Zhan, C. Z.; Lv, R. T.; Huang, Z. H.; Kang, F. Y., A high-power lithium-ion hybrid electrochemical capacitor based on citrate-derived electrodes. *Electrochimica Acta* **2017**, 228, 76-81.
16. Gu, T. L.; Wei, B. Q., High-performance all-solid-state asymmetric stretchable supercapacitors based on wrinkled MnO<sub>2</sub>/CNT and Fe<sub>2</sub>O<sub>3</sub>/CNT macrofilms. *Journal of Materials Chemistry A* **2016**, 4, (31), 12289-12295.
17. Ma, W.; Nan, H.; Gu, Z.; Geng, B.; Zhang, X., Superior performance asymmetric supercapacitors based on ZnCo<sub>2</sub>O<sub>4</sub>@MnO<sub>2</sub> core-shell electrode. *Journal of Materials Chemistry A* **2015**, 3, (10), 5442-5448.

18. Wang, Y. D.; Shen, C.; Niu, L. Y.; Li, R. Z.; Guo, H. T.; Shi, Y. X.; Li, C.; Liu, X. J.; Gong, Y. Y., Hydrothermal synthesis of CuCo<sub>2</sub>O<sub>4</sub>/CuO nanowire arrays and RGO/Fe<sub>2</sub>O<sub>3</sub> composites for high-performance aqueous asymmetric supercapacitors. *Journal of Materials Chemistry A* **2016**, 4, (25), 9977-9985.
19. Wang, J.; Zhang, L. P.; Liu, X. S.; Zhang, X.; Tian, Y. L.; Liu, X. X.; Zhao, J. P.; Li, Y., Assembly of flexible CoMoO<sub>4</sub>@NiMoO<sub>4</sub> center dot xH<sub>2</sub>O and Fe<sub>2</sub>O<sub>3</sub> electrodes for solid-state asymmetric supercapacitors. *Scientific reports* **2017**, 7.
20. Li, J. J.; Liu, M. C.; Kong, L. B.; Wang, D.; Hu, Y. M.; Han, W.; Kang, L., Advanced asymmetric supercapacitors based on Ni<sub>3</sub>(PO<sub>4</sub>)<sub>2</sub>@GO and Fe<sub>2</sub>O<sub>3</sub>@GO electrodes with high specific capacitance and high energy density. *Rsc Advances* **2015**, 5, (52), 41721-41728.
